# Supplementary material for: A Convolutional Neural Network for Automated Detection of Humpback Whale Song in a Diverse, Long-Term Passive Acoustic Dataset
Source: Frontiers journal article supplement (doi:10.3389/fmars.2021.607321), 2021-03-17
Supplement: Data_Sheet_1.pdf [file Data_Sheet_1.pdf]

## **A convolutional neural network for automated detection of humpback whale song in a diverse, long-term passive acoustic dataset: Supplementary Material**

### **Authors**

Ann N. Allen<sup>1\*</sup>, Matt Harvey<sup>2</sup>, Lauren Harrell<sup>3</sup>, Aren Jansen<sup>2</sup>, Karlina P. Merkens<sup>4</sup>, Carrie C. Wall<sup>5,6</sup>, Julie Cattiau<sup>2</sup>, Erin M. Oleson<sup>1</sup>

<sup>1</sup>NOAA Pacific Islands Fisheries Science Center, Honolulu HI, United States.

<sup>2</sup>Google, Inc., Mountain View, CA, United States.

<sup>3</sup>Google, Inc., Boulder, CO, United States.

<sup>4</sup>Lynker Technologies, LLC, Portland, OR. Under contract to NOAA Pacific Islands Fisheries Science Center, Honolulu, HI, United States.

<sup>5</sup>University of Colorado Boulder, Boulder, CO, United States.

<sup>6</sup>NOAA National Centers for Environmental Information, Boulder, CO, United States.

\*Corresponding author: [ann.n.allen@gmail.com](mailto:ann.n.allen@gmail.com)

| Site                     | Initial | Model-<br>dependent 1 | Model-<br>dependent 2 | Segments | Model-<br>dependent 3 | Model-<br>Dependent 4 | Validation | Expansion<br>of Test Set | Total  | Fraction of<br>Annotations<br>from Site | Fraction of<br>Audio from<br>Site |
|--------------------------|---------|-----------------------|-----------------------|----------|-----------------------|-----------------------|------------|--------------------------|--------|-----------------------------------------|-----------------------------------|
| Kona                     | 2733    | 455<br>(261)          | 1,260<br>(672)        | 650      | 79<br>(11)            |                       | 904        | 217<br>(119)             | 7,361  | 24.20%                                  | 29.40%                            |
| Cross SM                 |         | 11<br>(2)             | 1,098<br>(79)         | 137      | 85<br>(19)            | 289<br>(12)           | 319        | 106<br>(67)              | 2,224  | 7.30%                                   | 0.90%                             |
| Kauai                    | 1458    | 70<br>(2)             | 981<br>(53)           | 39       | 61<br>(18)            |                       | 2,670      | 2<br>(71)                | 5,507  | 18.10%                                  | 5.90%                             |
| Pearl and<br>Hermes Reef | 333     | 24<br>(14)            | 330<br>(564)          | 23       | 15<br>(72)            | 274<br>(26)           | 180        | 280<br>(325)             | 2,460  | 8.10%                                   | 8.80%                             |
| Ladd SM                  |         |                       | 179<br>(593)          |          | 5<br>(187)            |                       | 170        | 8<br>(65)                | 1,207  | 4.00%                                   | 1.30%                             |
| Kingman Reef             | 22      |                       | 276<br>(618)          |          | 4<br>(81)             |                       |            | 2<br>(71)                | 1,074  | 3.50%                                   | 1.70%                             |
| Palmyra                  |         |                       | 2<br>(33)             |          | (93)                  |                       | 202        | (205)                    | 535    | 1.80%                                   | 5.40%                             |
| Equator                  |         |                       | 4<br>(325)            |          | 97                    |                       |            | (70)                     | 496    | 1.60%                                   | 1.40%                             |
| Wake                     |         | 21                    | 179<br>(2,625)        | 20       | 1<br>(109)            | 185<br>(126)          | 297        | 68<br>(375)              | 4,006  | 13.20%                                  | 4.30%                             |
| Pagan                    |         |                       |                       |          |                       |                       |            | 132<br>(217)             | 349    | 1.10%                                   | 3.10%                             |
| Tinian                   |         | 122                   | 30<br>(563)           | 149      | 4<br>(101)            | 60<br>(245)           | 326        | 149<br>(295)             | 2,044  | 6.70%                                   | 17.20%                            |
| Saipan                   |         | 12<br>(6)             | 1,220<br>(617)        | 53       | 65<br>(34)            | 265<br>(37)           | 289        | 147<br>(357)             | 3,102  | 10.20%                                  | 20.60%                            |
| Total                    | 4546    | 1,000                 | 12,301                | 1,071    | 1,141                 | 1,519                 | 5,357      | 3,430                    | 30,365 |                                         |                                   |

**SUPPLEMENTARY TABLE 1.** Count of annotations by site and audit effort. Parenthesized values are counts of explicit negatives. In the columns without parenthesized values, all regions of audio that are in the sample but not marked as positive comprise the implicit negatives for the effort in that column.

|                                            | Training   | Validation<br>(Model<br>Metrics) | Test (Plots &<br>Tables) |
|--------------------------------------------|------------|----------------------------------|--------------------------|
| Duration Audited                           | 66.7 hours | 80.0 hours                       | 145.1 hours              |
| Duration Marked<br>Positive                | 5.45 hours | 1.9 hours                        | 27.4 hours               |
| Duration Marked<br>Explicitly Negative     | 3.1 hours  | 0 hours                          | 45.5 hours               |
| Duration of Implicit<br>Negatives          | 57.2 hours | 74.1 hours                       | 117.7 hours              |
| Number of Positive<br>Annotations          | 13,140     | 5,357                            | 6,600                    |
| Number of Explicit<br>Negative Annotations | 9,179      | 0                                | 2,187                    |
| Number of Segments<br>with Any Positive    | 6,773      | 195                              | 1,365                    |
| Number of Segments<br>with No Positive     | 9,365      | 3,452                            | 5,617                    |
| Amount Audited as<br>Percent of Corpus     | 0.04%      | 0.04%                            | 0.08%                    |

**SUPPLEMENTARY TABLE 2.** Scale of the annotation effort. The total audio duration of the entire dataset is over 20 years; only a very small fraction of that was audited.

|                              |      | Average<br>Precision | AUC-<br>ROC |
|------------------------------|------|----------------------|-------------|
| Compression<br>Method        | PCEN | 0.90                 | 0.99        |
|                              | log  | 0.84                 | 0.96        |
|                              | root | 0.77                 | 0.95        |
| Context Window<br>Length (s) | 1.28 | 0.94                 | 1.00        |
|                              | 3.84 | 0.97                 | 1.00        |
|                              | 6.4  | 0.96                 | 0.99        |

**SUPPLEMENTARY TABLE 3.** Compression and time scale experiment metrics computed on the validation set from the checkpoint with highest average precision.

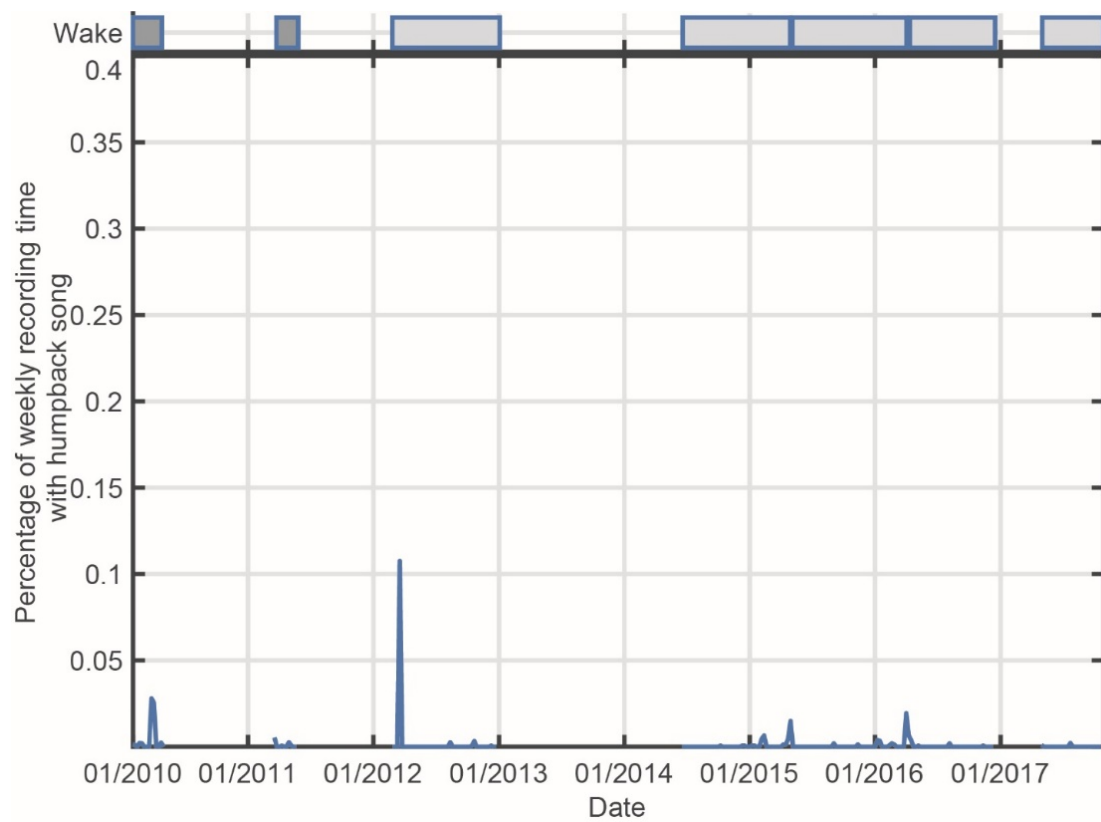

**Supplementary Figure 1.** Percentage of recording time per week containing positive detections at Wake Island. Shaded boxes represent the time periods that have recordings, with shading indicating duty cycle, which ranged from 16.7% to 50% recording time.

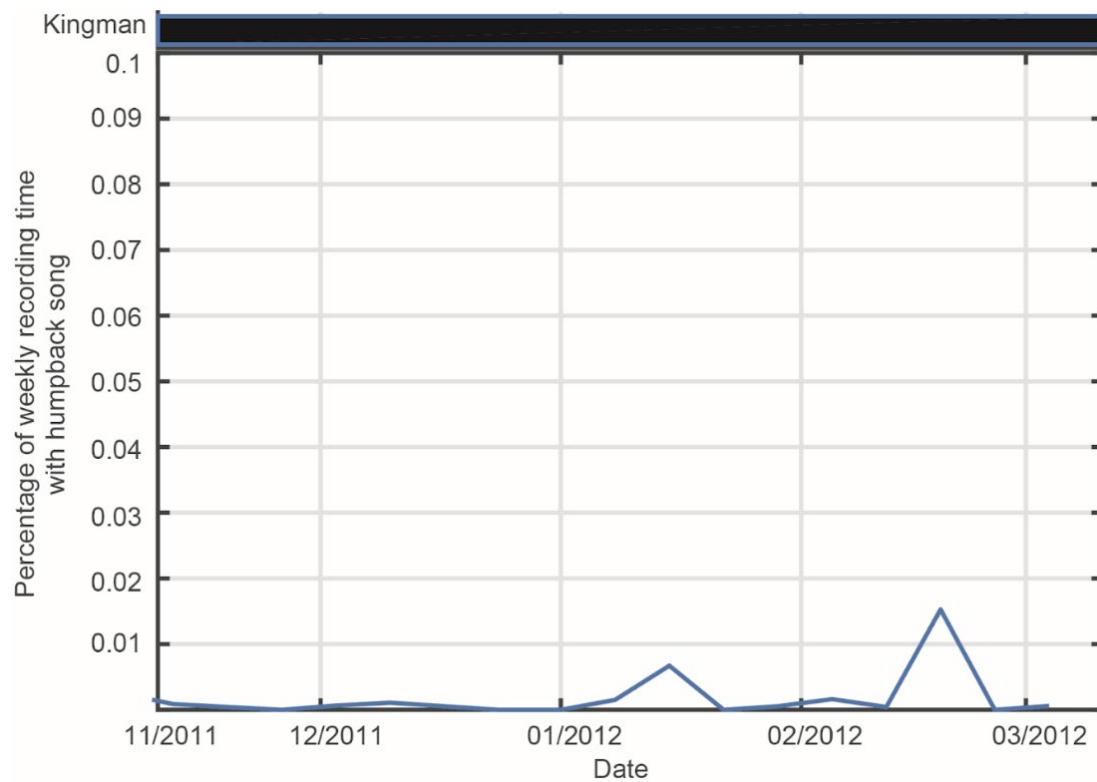

**Supplementary Figure 2.** Percentage of recording time per week containing positive detections at Kingman Reef. Recording duty cycle was continuous for Kingman Reef.

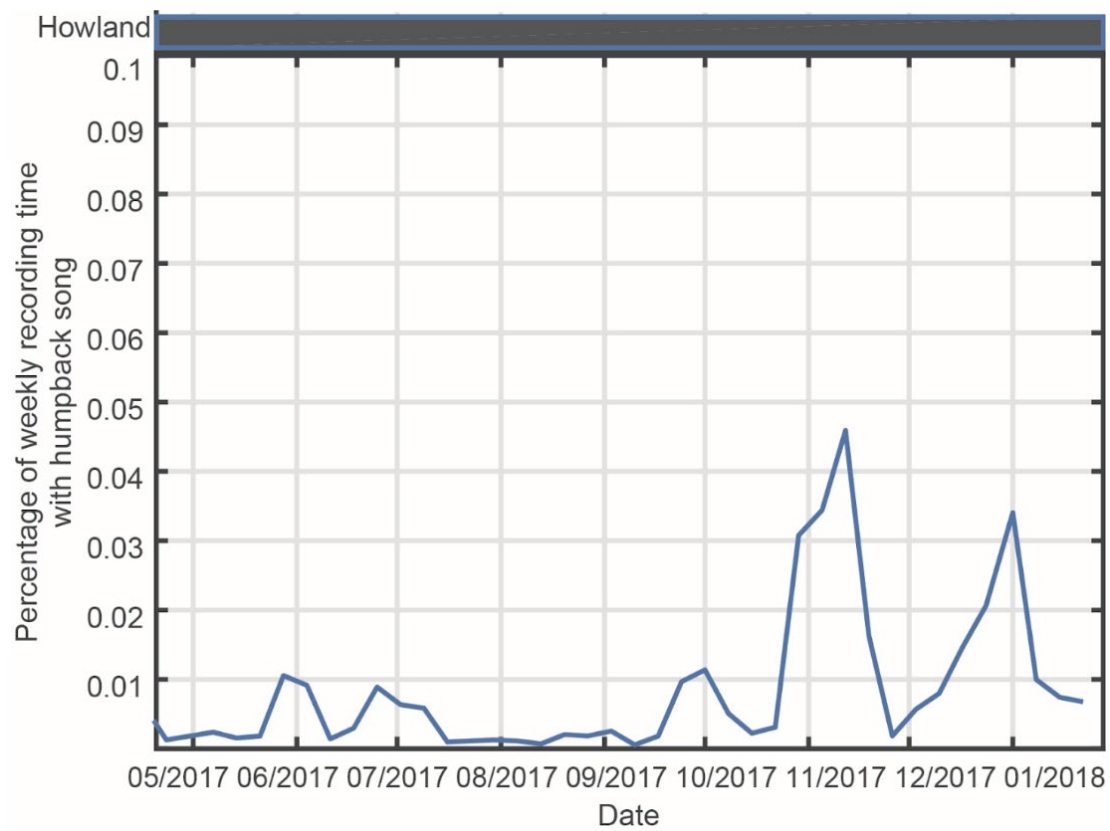

**Supplementary Figure 3.** Percentage of recording time per week containing positive detections at Howland Reef. Duty cycle was 80% for Howland Island.

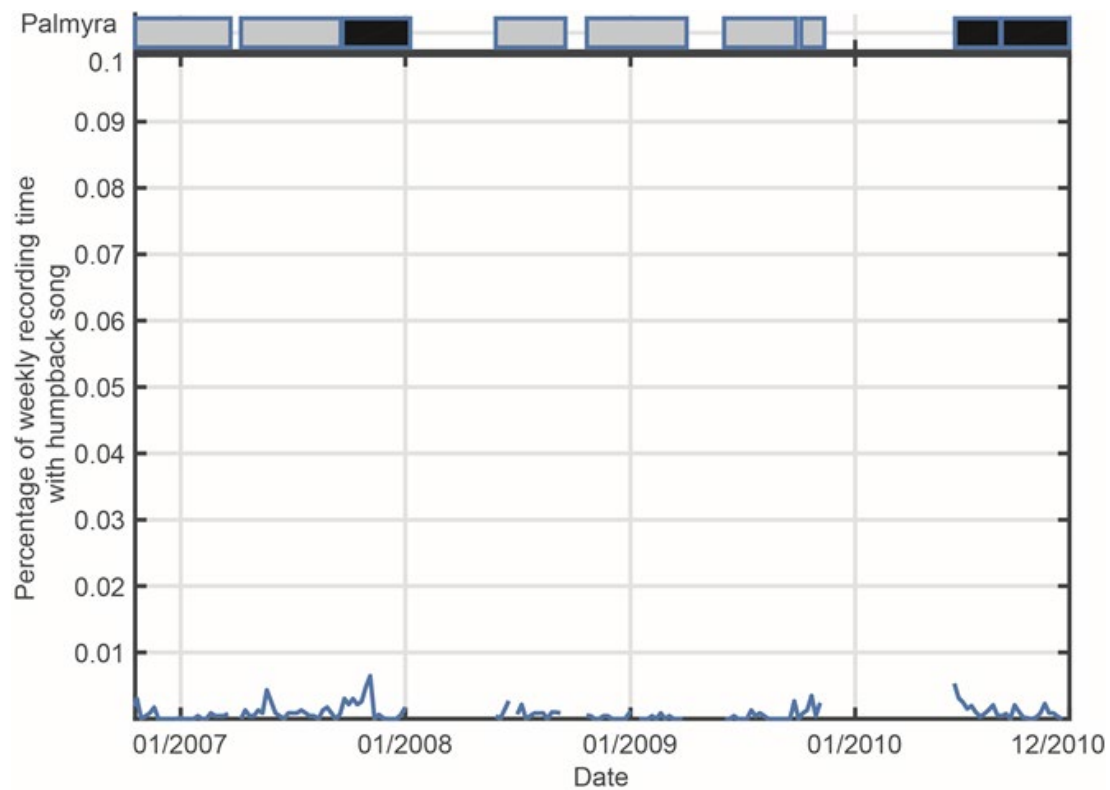

**Supplementary Figure 4.** Percentage of recording time per week containing positive detections at Palmyra Island. Shaded boxes represent the time periods that have recordings, with shading indicating duty cycle, which ranged from 25% to continuous recording time.
